# Supplementary material for: One-step fabrication of β-Ga2O3–amorphous-SnO2 core–shell microribbons and their thermally switchable humidity sensing properties
Source: Royal Society of Chemistry journal article supplement (doi:10.1039/c2jm32230g), 2012-01-01
Supplement: c2jm32230g.pdf [file c2jm32230g.pdf]

## Supporting information

### 1. Synthesis and characterization of $\beta$ -Ga<sub>2</sub>O<sub>3</sub>/amorphous-SnO<sub>2</sub> core/shell microribbons.

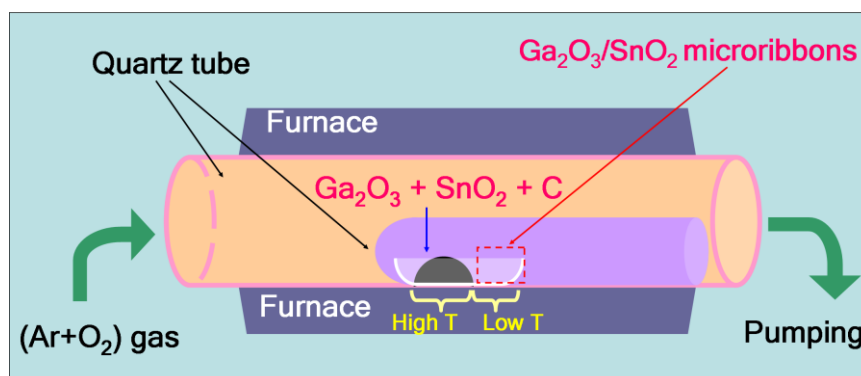

**Figure S1.** Schematic diagram of experimental apparatus for growth of  $\beta$ -Ga<sub>2</sub>O<sub>3</sub>/amorphous-SnO<sub>2</sub> core/shell microribbons.

### 2. Measurement of core/shell microribbon device.

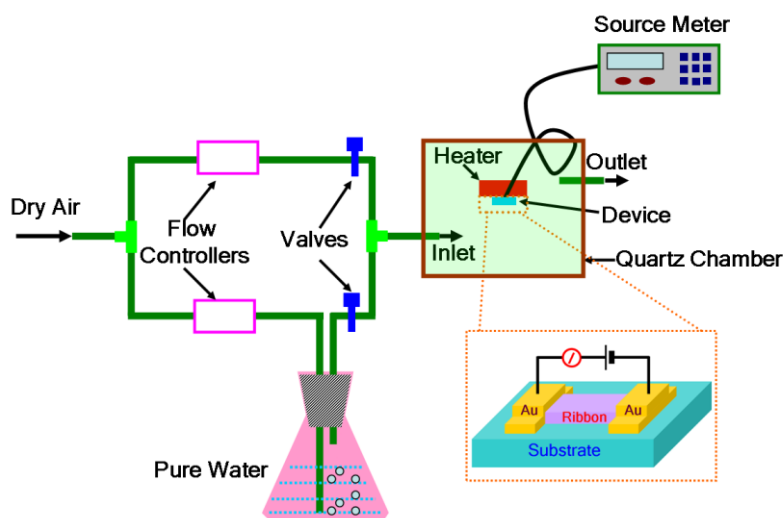

**Figure S2.** Schematic diagram of a system to measure the gas-sensing and thermal-switchable properties of  $\beta$ -Ga<sub>2</sub>O<sub>3</sub>/amorphous-SnO<sub>2</sub> core/shell microribbon.

### 3. Electrical response of core/shell microribbon device.

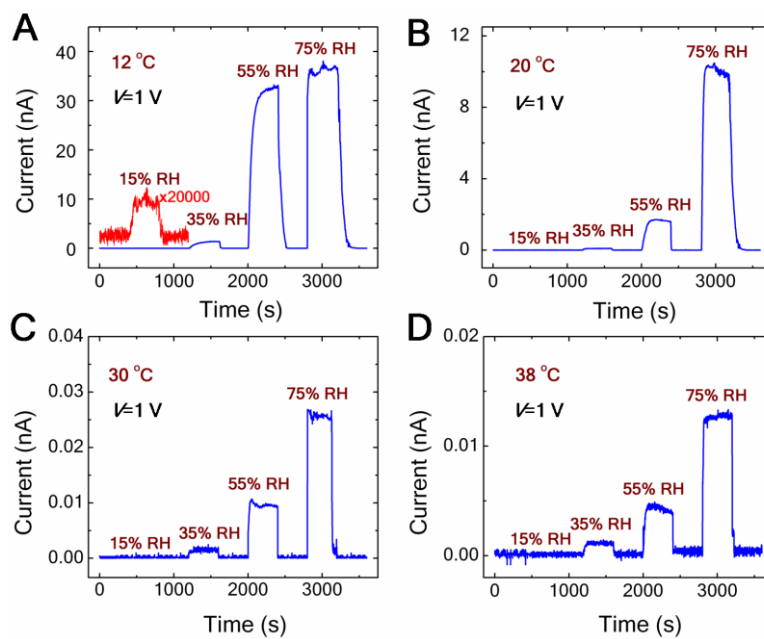

**Figure S3.** Electrical response of core/shell microribbon-based humidity sensor during cyclic exposure to increasing RH between 15 and 75% in dry air at different operation temperatures of A) 12, B) 20, C) 30 and D) 38 °C. Current was measured at a fixed voltage of 1 V.
